# Supplementary material for: Post-insemination selection dominates pre-insemination selection in driving rapid evolution of male competitive ability
Source: PubMed Central journal article supplement (PMC8880957; doi:10.1371/journal.pgen.1010063), 2022-02-14

## Post-Insemination Selection Dominates Pre-Insemination Selection in Driving Rapid Evolution of Male Competitive Ability --Manuscript Draft--

|                                                                                                                                                                                                                                                                                                                                                                                                                                                                                                          |                                                                                                                                                                                                                                                                                                                                                                                                                                                                                                                                                                                                                                                                                                                                                                                                                                                                                                                                                                                                                                                                                                                                                                                                                                                                                                                                                                                                                                                                                                                                                                                                                                                                                                           |
|----------------------------------------------------------------------------------------------------------------------------------------------------------------------------------------------------------------------------------------------------------------------------------------------------------------------------------------------------------------------------------------------------------------------------------------------------------------------------------------------------------|-----------------------------------------------------------------------------------------------------------------------------------------------------------------------------------------------------------------------------------------------------------------------------------------------------------------------------------------------------------------------------------------------------------------------------------------------------------------------------------------------------------------------------------------------------------------------------------------------------------------------------------------------------------------------------------------------------------------------------------------------------------------------------------------------------------------------------------------------------------------------------------------------------------------------------------------------------------------------------------------------------------------------------------------------------------------------------------------------------------------------------------------------------------------------------------------------------------------------------------------------------------------------------------------------------------------------------------------------------------------------------------------------------------------------------------------------------------------------------------------------------------------------------------------------------------------------------------------------------------------------------------------------------------------------------------------------------------|
| <b>Manuscript Number:</b>                                                                                                                                                                                                                                                                                                                                                                                                                                                                                | PGENETICS-D-21-00891                                                                                                                                                                                                                                                                                                                                                                                                                                                                                                                                                                                                                                                                                                                                                                                                                                                                                                                                                                                                                                                                                                                                                                                                                                                                                                                                                                                                                                                                                                                                                                                                                                                                                      |
| <b>Full Title:</b>                                                                                                                                                                                                                                                                                                                                                                                                                                                                                       | Post-Insemination Selection Dominates Pre-Insemination Selection in Driving Rapid Evolution of Male Competitive Ability                                                                                                                                                                                                                                                                                                                                                                                                                                                                                                                                                                                                                                                                                                                                                                                                                                                                                                                                                                                                                                                                                                                                                                                                                                                                                                                                                                                                                                                                                                                                                                                   |
| <b>Short Title:</b>                                                                                                                                                                                                                                                                                                                                                                                                                                                                                      | Post-Insemination Selection Drives Male Evolution                                                                                                                                                                                                                                                                                                                                                                                                                                                                                                                                                                                                                                                                                                                                                                                                                                                                                                                                                                                                                                                                                                                                                                                                                                                                                                                                                                                                                                                                                                                                                                                                                                                         |
| <b>Article Type:</b>                                                                                                                                                                                                                                                                                                                                                                                                                                                                                     | Research Article                                                                                                                                                                                                                                                                                                                                                                                                                                                                                                                                                                                                                                                                                                                                                                                                                                                                                                                                                                                                                                                                                                                                                                                                                                                                                                                                                                                                                                                                                                                                                                                                                                                                                          |
| <b>Section/Category:</b>                                                                                                                                                                                                                                                                                                                                                                                                                                                                                 | Evolution                                                                                                                                                                                                                                                                                                                                                                                                                                                                                                                                                                                                                                                                                                                                                                                                                                                                                                                                                                                                                                                                                                                                                                                                                                                                                                                                                                                                                                                                                                                                                                                                                                                                                                 |
| <b>Keywords:</b>                                                                                                                                                                                                                                                                                                                                                                                                                                                                                         | experimental evolution, sexual selection, reproductive success, genomics, <i>Caenorhabditis elegans</i>                                                                                                                                                                                                                                                                                                                                                                                                                                                                                                                                                                                                                                                                                                                                                                                                                                                                                                                                                                                                                                                                                                                                                                                                                                                                                                                                                                                                                                                                                                                                                                                                   |
| <b>Abstract:</b>                                                                                                                                                                                                                                                                                                                                                                                                                                                                                         | Sexual reproduction is a complex process that contributes to differences between the sexes and divergence between species. From a male's perspective, sexual selection can optimize reproductive success by acting on the variance in mating success (pre-insemination selection) as well as the variance in fertilization success (post-insemination selection). The balance between pre- and post-insemination selection has not yet been investigated using a strong hypothesis-testing framework that directly quantifies the effects of post-insemination selection on the evolution of reproductive success. Here we use experimental evolution of a uniquely engineered genetic system that allows sperm production to be turned off and on in obligate male-female populations of <i>Caenorhabditis elegans</i> . We show that enhanced post-insemination competition increases the efficacy of selection and surpasses pre-insemination sexual selection in driving a polygenic response in male reproductive success. We find that after 30 generations post-insemination selection increased male reproductive success by an average of 5- to 7-fold. Contrary to expectation, enhanced pre-insemination competition hindered selection and slowed the rate of evolution. Furthermore, we found that post-insemination selection resulted in a strong polygenic response at the whole-genome level. Our results demonstrate that post-insemination sexual selection plays a critical role in the rapid optimization of male reproductive fitness. Therefore, explicit consideration should be given to post-insemination dynamics when considering the population effects of sexual selection. |
| <b>Additional Information:</b>                                                                                                                                                                                                                                                                                                                                                                                                                                                                           |                                                                                                                                                                                                                                                                                                                                                                                                                                                                                                                                                                                                                                                                                                                                                                                                                                                                                                                                                                                                                                                                                                                                                                                                                                                                                                                                                                                                                                                                                                                                                                                                                                                                                                           |
| <b>Question</b>                                                                                                                                                                                                                                                                                                                                                                                                                                                                                          | <b>Response</b>                                                                                                                                                                                                                                                                                                                                                                                                                                                                                                                                                                                                                                                                                                                                                                                                                                                                                                                                                                                                                                                                                                                                                                                                                                                                                                                                                                                                                                                                                                                                                                                                                                                                                           |
| <p><b>Financial Disclosure</b></p> <p>Enter a financial disclosure statement that describes the sources of funding for the work included in this submission. Review the <a href="#">submission guidelines</a> for detailed requirements. View published research articles from <a href="#">PLOS Genetics</a> for specific examples.</p> <p>This statement is required for submission and <b>will appear in the published article</b> if the submission is accepted. Please make sure it is accurate.</p> | <p>This work was funded by National Institutes of Health grant R35GM131838 to PCP (<a href="https://grants.nih.gov/grants/guide/pa-files/PAR-17-094.html">https://grants.nih.gov/grants/guide/pa-files/PAR-17-094.html</a>). KRK is supported by a Natural Sciences and Engineering Research Council of Canada Banting Postdoctoral Fellowship (<a href="https://banting.fellowships-bourses.gc.ca/en/2019-2020-eng.html">https://banting.fellowships-bourses.gc.ca/en/2019-2020-eng.html</a>). The funders had no role in study design, data collection and analysis, decision to publish, or preparation of the manuscript.</p>                                                                                                                                                                                                                                                                                                                                                                                                                                                                                                                                                                                                                                                                                                                                                                                                                                                                                                                                                                                                                                                                         |

### Unfunded studies

Enter: *The author(s) received no specific funding for this work.*

### Funded studies

Enter a statement with the following details:

- Initials of the authors who received each award
- Grant numbers awarded to each author
- The full name of each funder
- URL of each funder website
- Did the sponsors or funders play any role in the study design, data collection and analysis, decision to publish, or preparation of the manuscript?
- **NO** - Include this sentence at the end of your statement: *The funders had no role in study design, data collection and analysis, decision to publish, or preparation of the manuscript.*
- **YES** - Specify the role(s) played.

\* typeset

### Competing Interests

Use the instructions below to enter a competing interest statement for this submission. On behalf of all authors, disclose any [competing interests](#) that could be perceived to bias this work—acknowledging all financial support and any other relevant financial or non-financial competing interests.

This statement **will appear in the published article** if the submission is accepted. Please make sure it is accurate. View published research articles from [PLOS Genetics](#) for specific examples.

The authors have declared that no competing interests exist.

**NO authors have competing interests**

Enter: *The authors have declared that no competing interests exist.*

**Authors with competing interests**

Enter competing interest details beginning with this statement:

*I have read the journal's policy and the authors of this manuscript have the following competing interests: [insert competing interests here]*

\* typeset

This statement is **required** for submission and **will appear in the published article** if the submission is accepted. Please make sure it is accurate and that any funding sources listed in your Funding Information later in the submission form are also declared in your Financial Disclosure statement.

**Data Availability**

Authors are required to make all data underlying the findings described fully available, without restriction, and from the time of publication. PLOS allows rare exceptions to address legal and ethical concerns. See the [PLOS Data Policy](#) and [FAQ](#) for detailed information.

A Data Availability Statement describing where the data can be found is required at submission. Your answers to this question constitute the Data Availability Statement and will be published in the article, if accepted.

Yes - all data are fully available without restriction

**Important:** Stating 'data available on request from the author' is not sufficient. If your data are only available upon request, select 'No' for the first question and explain your exceptional situation in the text box.

Do the authors confirm that all data underlying the findings described in their manuscript are fully available without restriction?

**Describe where the data may be found in full sentences. If you are copying our sample text, replace any instances of XXX with the appropriate details.**

- If the data are **held or will be held in a public repository**, include URLs, accession numbers or DOIs. If this information will only be available after acceptance, indicate this by ticking the box below. For example: *All XXX files are available from the XXX database (accession number(s) XXX, XXX).*
- If the data are all contained **within the manuscript and/or Supporting Information files**, enter the following: *All relevant data are within the manuscript and its Supporting Information files.*
- If neither of these applies but you are able to provide **details of access elsewhere**, with or without limitations, please do so. For example:

*Data cannot be shared publicly because of [XXX]. Data are available from the XXX Institutional Data Access / Ethics Committee (contact via XXX) for researchers who meet the criteria for access to confidential data.*

*The data underlying the results presented in the study are available from (include the name of the third party and contact information or URL).*

- This text is appropriate if the data are owned by a third party and authors do not have permission to share the data.

The oligonucleotides and synthetic constructs used in this study are available as Supplemental Tables S1-S3. The sequence data will be made publicly available on NCBI prior to publication. Model summary statistics for the genomic analyses (Files S1-S6) and the fertility data (File S7) are available in the Figshare repository <https://figshare.com/s/735e8011f9a1239a5c85>, which will be made public upon acceptance. All R scripts are available via the GitHub repository [https://github.com/katjakasimatis/postinsemination\\_expevol](https://github.com/katjakasimatis/postinsemination_expevol). Worm strains PX624, PX631, and PX658 will be made available from the Caenorhabditis Genetics Center. All other strains are available from the Phillips Lab upon request.

|                                           |                                                                                                                                                                                  |
|-------------------------------------------|----------------------------------------------------------------------------------------------------------------------------------------------------------------------------------|
| * typeset                                 |                                                                                                                                                                                  |
| Additional data availability information: | Tick here if the URLs/accession numbers/DOIs will be available only after acceptance of the manuscript for publication so that we can ensure their inclusion before publication. |

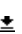

1 Post-Insemination Selection Dominates Pre-Insemination Selection in Driving Rapid Evolution  
2 of Male Competitive Ability

3

4

5

Short Title: Post-Insemination Selection Drives Male Evolution

6

7

8 Katja R. Kasimatis<sup>1,#a\*</sup>, Megan J. Moerdyk-Schauwecker<sup>1</sup>, Ruben Lancaster<sup>1</sup>, Alexander Smith<sup>1</sup>,  
9 John H. Willis<sup>1</sup>, and Patrick C. Phillips<sup>1\*</sup>

10

11 <sup>1</sup>Institute of Ecology and Evolution, University of Oregon, Eugene, Oregon, United States of  
12 American

13

14 <sup>#a</sup>Current address: Department of Ecology and Evolutionary Biology, University of Toronto,  
15 Toronto, Ontario, Canada

16

17 \*Corresponding authors:

18 Email: [k.kasimatis@utoronto.ca](mailto:k.kasimatis@utoronto.ca) (KRK)

19 Email: [pphil@uoregon.edu](mailto:pphil@uoregon.edu) (PCP)

20

## 21 **Abstract**

22 Sexual reproduction is a complex process that contributes to differences between the sexes and  
23 divergence between species. From a male’s perspective, sexual selection can optimize  
24 reproductive success by acting on the variance in mating success (pre-insemination selection) as  
25 well as the variance in fertilization success (post-insemination selection). The balance between  
26 pre- and post-insemination selection has not yet been investigated using a strong hypothesis-  
27 testing framework that directly quantifies the effects of post-insemination selection on the  
28 evolution of reproductive success. Here we use experimental evolution of a uniquely engineered  
29 genetic system that allows sperm production to be turned off and on in obligate male-female  
30 populations of *Caenorhabditis elegans*. We show that enhanced post-insemination competition  
31 increases the efficacy of selection and surpasses pre-insemination sexual selection in driving a  
32 polygenic response in male reproductive success. We find that after 30 generations post-  
33 insemination selection increased male reproductive success by an average of 5- to 7-fold.  
34 Contrary to expectation, enhanced pre-insemination competition hindered selection and slowed  
35 the rate of evolution. Furthermore, we found that post-insemination selection resulted in a strong  
36 polygenic response at the whole-genome level. Our results demonstrate that post-insemination  
37 sexual selection plays a critical role in the rapid optimization of male reproductive fitness.  
38 Therefore, explicit consideration should be given to post-insemination dynamics when  
39 considering the population effects of sexual selection.

40

## 41 **Author Summary**

42 Some of the most dramatic and diverse phenotypes observed in nature—such as head-butting in  
43 wild sheep and the elaborate tails of peacocks—are between the sexes. These remarkable  
44 phenotypes are a result of sexual selection optimizing reproductive success in females and males  
45 independently. For males, total reproductive success is comprised of winning a mating event and  
46 then translating that mating event into a fertilization event. Therefore, to understand not only  
47 how male reproductive success is comprised, but also how it evolves, we must examine the  
48 interaction between pre- and post-insemination sexual selection. We combine environmentally-  
49 inducible control of sperm production within a highly reproducible factorial experimental  
50 evolution design to directly quantify the contribution of post-insemination selection to male

51 reproductive evolution. We demonstrate that enhanced sperm competition increases the efficacy  
52 of selection and enhances the rate of male evolution. Alternatively, we show that enhanced pre-  
53 insemination competition slows the evolutionary rate. Using whole-genome approaches, we  
54 identify over 60 genes that contribute to male fertilization success. Brought together, our new  
55 approaches and results demonstrate that the unseen world of molecular interactions occurring  
56 during post-insemination are as fundamentally important as the pre-mating factors that lead to  
57 some of the most fascinating traits.

58

## 59 **Introduction**

60 Sexual selection drives the evolution of some of the most remarkable phenotypes observed in  
61 nature. Interest in these flashy phenotypes has led to a focus on studying pre-insemination  
62 reproductive dynamics, such as male-male competition and female choice [1]. However, in  
63 animals with internal fertilization, reproduction is more complex and requires a series of  
64 interactions within and between the sexes to produce a viable offspring. From a male's  
65 perspective, total reproductive success can be partitioned into successfully winning a mating  
66 event and then successfully winning a fertilization event. Therefore, sexual selection has the  
67 potential to act on both the variance in mating success and the variance in fertilization success  
68 (also referred to as gametic selection [2,3]). We do not know how selection during these  
69 reproductive phases interacts in an additive, antagonistic, or synergistic manner to optimize total  
70 male reproductive success. Understanding this balance is critical not only for quantifying male  
71 reproductive fitness within a generation, but also for understanding how sexual selection shapes  
72 the evolution of reproductive success over time. Such processes are critical for relating the role  
73 of sexual selection to population adaptation [4,5] and divergence [6].

74 Experimental separation of sexual selection before and after mating within an adaptive  
75 framework has proved extremely challenging. Previous studies have taken the approach of  
76 Arnold and Wade [7] to partition the variance in total reproductive success into the variance in  
77 mating success and the variance in fertilization success [reviewed in 8]. These studies have  
78 inferred mixed results as to opportunity for sexual selection. Several studies suggest that the  
79 variance in mating success comprises greater than 95% of the total variance in reproductive  
80 success [9,10], while others indicate a greater contribution of the post-insemination phase [11-  
81 15]. Additionally, evolutionary analyses of seminal fluid proteins show a high opportunity for



82 post-insemination selection [16,17]. While informative, the opportunity for sexual selection does  
83 not necessarily translate into realized selection, which contributes to the lack of consistent  
84 patterns between studies. Moreover, this framework is an indirect approach for partitioning  
85 reproductive success and thus lacks the ability to connect the action of selection to the  
86 underlying genomic response to understand how reproductive success is evolving.

87 *Caenorhabditis elegans* is an ideal system for disentangling mating interactions. First, the  
88 mating system in *C. elegans* can be manipulated to prevent hermaphrodite self-sperm production  
89 and create functional females that rely on male-female mating. Males in these populations have  
90 low reproductive success relative to males from obligate outcrossing *Caenorhabditis* species  
91 [18], which creates a high opportunity for the evolution of reproductive success. Second, we  
92 have developed an external, non-toxic sterility system for *C. elegans* [19] that capitalizes on the  
93 auxin-inducible degron system to degrade the critical spermatogenesis gene *spe-44* and  
94 effectively turn off sperm production. The induction of sterility allows for sperm competitive  
95 dynamics to be isolated from male-male competitive dynamics for thousands of worms at a time.  
96 Finally, *C. elegans* is amenable to the evolve and re-sequence experimental approach [20,21],  
97 which allows us to not only quantify the impact of sexual selection on reproductive success, but  
98 also identify the underlying genetic structure of the traits involved.

99 Here we capitalize on transgenics to isolate the contributions of pre-insemination mating  
100 competition versus post-insemination sperm competition to the evolution of reproductive fitness  
101 of a newly derived *C. elegans* male population. We first create an obligate outcrossing *C.*  
102 *elegans* population composed of functional females and males with inducible sterility. We then  
103 performed 30 generations of replicated experimental evolution using a factorial design that  
104 partitions sexual selection due to within-strain and between-strain competitive dynamics  
105 occurring during pre-insemination and post-insemination. This experiment explicitly tests if pre-  
106 insemination sexual selection and post-insemination sexual selection contribute to reproductive  
107 success in an additive, synergistic, or antagonistic manner. If pre- and post-insemination  
108 selection are additive or synergistic, then we expect to see the greatest increase in total  
109 reproductive success when competition is enhanced through the addition of external male  
110 competitors during both reproductive stages. Alternatively, if these phases are antagonistic such  
111 that competition is beneficial during one stage but detrimental during the other, then we expect to  
112 see a reduction in total reproductive success when competition is enhanced during both

113 reproductive stages. We can infer the source of antagonistic competition by comparing-and-  
114 contrasting the effects of enhanced and reduced post-insemination competition.

115

## 116 **Results**

### 117 **Factorial framework to isolate selection on mating and fertilization** 118 **success**

119 We designed an experimental evolution framework that controls pre- and post-insemination  
120 competitive interactions using three distinct and powerful genetic manipulations: a mutation in  
121 the sex determination pathway (*fog-2*) to disrupt self-sperm production in hermaphrodites and  
122 maintain obligate male-female mating [18], targeted degradation of a key spermatogenesis  
123 protein (*spe-44*) to control male mating duration [19], and an inducible lethal marker (*peel-1*) to  
124 eliminate offspring from competitor males [22]. To generate a selective event, male sterility was  
125 induced after an initial mating period (Fig 1). Increased sperm competition was then generated  
126 by adding competitor males from a different strain. After a 24 hour competitive phase, progeny  
127 were collected, hatched, and then heat-shocked to induce lethality of the competitor male cross-  
128 progeny, leaving only those progeny from the evolving males to start the next generation. This  
129 design isolates sperm competitive success from male mating success and selects for sperm  
130 defensive capability and longevity.

131 The induction of sterility and addition of competitor males generated a factorial  
132 experimental design resulting in four experimental evolution regimes (Fig 2A). When both  
133 sterility was introduced and competitors subsequently added (between-strain post-insemination  
134 only competition, BS-PO), there was increased sexual selection on post-insemination fertilization  
135 dynamics. Alternatively, when only sterility was induced, and competitor males not added  
136 (within-strain post-insemination only competition, WS-PO), evolving males experienced reduced  
137 sperm competition and potentially decreased post-insemination sexual selection. To represent the  
138 full degree of sexual selection acting on pre- and post-insemination competition (between-strain  
139 pre- and post-insemination competition, BS-P&P), sterility was not induced, but competitor  
140 males were added. Finally, no direct sexual selection was applied when neither sterility was  
141 induced nor competitors added (within-strain pre- and post-insemination competition, WS-P&P).

142 The WS-P&P regime represents the base level of sexual selection experienced by recently  
143 derived *C. elegans* males.

## 144 **Opportunity for selection is high in the ancestral population**

145 We used multiple rounds of low-dose EMS mutagenesis to generate genetic variation in the  
146 ancestral population (Fig S1). Based on the mutation rate of EMS per generation [23], at least  
147 937,500 non-exclusive mutations were expected to be segregating in the post-mutagenesis  
148 population prior to lab adaptation. We observed 321,929 SNPs segregating in the ancestral  
149 population, suggesting strong purifying selection during the pre-experimental evolution lab  
150 adaptation period (Fig S1). The ancestral population had a genome-wide mean nucleotide  
151 diversity of  $\pi = 0.06$  and the minor allele frequency ranged from 0.004 to 0.5 (Fig S2A-D; File  
152 S1). These diversity estimates are higher than those commonly observed in *C. elegans* and are  
153 more comparable to the obligate outcrossing species *C. remanei* [24]. The distribution of variants  
154 was relatively even across chromosome domains, unlike the characteristic pattern of higher  
155 diversity on the chromosome arms when compared to the chromosome center [25-27] (Fig S2C-  
156 D; File S2). SNP density, however, reflected this chromosome arm-center pattern: the mean SNP  
157 density on chromosome arms was  $\theta_w = 0.004$  and in chromosome centers was  $\theta_w = 0.002$  (Fig  
158 S2E-F). Despite the X chromosome having a slightly higher recombination rate in the small  
159 chromosome center domain [25] coupled with a greater opportunity for purifying selection in  
160 males, the X did not have the lowest SNP density (mean  $\theta_w = 0.0027$ ) as expected. Instead,  
161 chromosome I had a significantly lower mean SNP density (mean  $\theta_w = 0.0012$ ;  $t = -67$ ,  $p <$   
162  $0.001$ ) than the other chromosomes. Together these summary statistics indicate that the ancestral  
163 population had more segregating genetic variants than is commonly observed in *C. elegans*,  
164 though much of this diversity is not in the gene dense chromosome centers.

165 We quantified ancestral reproductive success under highly competitive conditions  
166 occurring during both pre- and post-insemination (i.e., total reproductive success) and during  
167 post-insemination alone using a novel male competitor (Fig 2B). Total reproductive success was  
168 slightly, though significantly, poorer than the null expectation of equal competitive ability  
169 between ancestral male and competitor male backgrounds (proportions test:  $\chi^2 = 6.87$ , d.f. = 1,  $p$   
170  $< 0.01$ , 95% C.I. of ancestral competitive success = 40.4–48.6%). Ancestral male sperm  
171 competitive ability was especially poor with an average of 4.1% of progeny coming from

172 ancestral males relative to the competitor (proportions test:  $\chi^2 = 863$ , d.f. = 1,  $p < 0.0001$ , 95%  
173 C.I. of ancestral sperm competitive success = 3.0–5.5%). Therefore, in the ancestral population  
174 post-insemination success only contributed 9.2% to the overall reproductive success of males  
175 (Fig 2C). The poor reproductive success of ancestral males under competitive conditions  
176 indicates the opportunity for selection – particularly gametic selection – to improve male  
177 competitive ability was high.

## 178 **Post-insemination selection drove evolutionary change in males**

179 We quantified total reproductive success for each replicate population after 10 selective events  
180 occurring over 30 generations of evolution under the same highly competitive conditions used to  
181 assay the ancestral males. The contribution of post-insemination increased across all evolved  
182 replicates relative to the ancestor, such that on average post-insemination success contributed  
183 26.7% to 34.7% of total male reproductive success (Fig 2C). The BS-P&P and WS-PO regimes  
184 trended towards a higher fraction of total reproductive success that could be attributed to post-  
185 insemination success across replicate means, suggesting that enhanced post-insemination  
186 competition positively affects fertilization success. Interestingly, post-insemination contribution  
187 increased to 79.7% in a single BS-P&P replicate. This evolutionary increase was due to a 13-fold  
188 increase in post-insemination success and only a 1.4-fold increase in total reproductive success.

189 Overall, the increased contribution of post-insemination dynamics was driven by the  
190 significant increase in post-insemination reproductive success of evolved males compared to  
191 ancestral males (Fig 2D; WS-P&P:  $z$ -value = 3.7,  $p < 0.001$ ; BS-P&P:  $z$ -value = 3.6,  $p = 0.001$ ;  
192 WS-PO:  $z$ -value = 3.4,  $p = 0.002$ ; BS-PO:  $z$ -value = 4.0,  $p < 0.001$ ). Once again, the BS-PO  
193 regime showed the strongest evolutionary response with a 6.8-fold increase from the ancestor,  
194 which supports the hypothesis that enhanced post-insemination competition increases the  
195 efficacy of sexual selection. Additionally, the WS-PO regime – the regime with the lowest levels  
196 of post-insemination competition – comparatively showed the lowest mean evolutionary change  
197 from the ancestor, though overall the evolutionary response was still strong. However, a post hoc  
198 test to determine if experimental evolution under directed sexual selection increased the rate at  
199 which post-insemination evolved relative to the WS-P&P baseline conditions showed no  
200 significant difference between regimes, suggesting a strong underlying selective pressure on  
201 sperm competitive ability.

202 Total reproductive success of evolved males compared to ancestral males also increased  
203 significantly across regimes (WS-P&P: z-value = 4.7,  $p < 0.001$ ; BS-P&P: z-value = 2.7,  $p =$   
204 0.02; WS-PO: z-value = 3.5,  $p < 0.001$ ; BS-PO: z-value = 3.6,  $p < 0.001$ ), though to a lesser  
205 extent than post-insemination success alone (Fig 2D). Interestingly, only the BS-P&P regime  
206 showed a significant effect of sexual selection ( $z = -3.6$ ,  $p < 0.001$ ) compared to the baseline  
207 WS-P&P regime. Contrary to expectation [5,28], enhanced pre-insemination competition  
208 reduced the evolutionary response in male reproductive success. The WS-PO and BS-PO were  
209 not significantly different from the baseline. Thus, increasing the opportunity for pre-  
210 insemination sexual selection did not lead to faster evolution. Rather, enhanced pre-insemination  
211 competition appeared to hinder the rate of evolution of male reproductive success.

## 212 **Effective population size reflects strong selection**

213 The effective population size ( $N_e$ ) ranged from 16% to 24% of the census size ( $N = 5,000$ ) across all  
214 replicates and regimes (Fig S3; File S3). Regimes where post-insemination interactions were  
215 isolated had on average lower effective population sizes across all chromosomes than the WS-  
216 P&P and BS-P&P regimes. However, there was no significant effect of regime on  $N_e$  (ANOVA:  
217  $F = 0.72$ , d.f. = 3,  $p = 0.54$ ). Variance in reproductive success impacts  $N_e$ , especially when the  
218 sex ratio of breeding individuals is skewed. We calculated the upper bound on the number of  
219 breeding males [29], under the assumption that all females reproduced and the reduction in  
220 population size was due to variance in male reproductive success alone. For the estimated  $N_e$   
221 range, this analysis suggests that only 222-333 males reproduced (8.9-13.3% of the census male  
222 population), supporting strong sexual selection acted on males.

223 Given the XX/XO chromosomal sex determination system of *C. elegans*, we expected the  
224 estimated effective population size of the X chromosome to be approximately 75% of the  
225 estimated effective population size of the autosomes. The effective population size was  
226 significantly different between the autosomes and sex chromosome ( $t = 3.34$ , d.f. = 24.5,  $p <$   
227 0.01). However, contrary to expectation, the mean effective population size estimated using X  
228 chromosome SNPs was 1.9 times larger than that estimated using autosomal SNPs.

## 229 **Sperm competitive ability is a polygenic trait**

230 We fit two complementary models to determine if the frequency of alleles at each SNP changed  
231 from the ancestral population to the evolved population in each regime. Model 1 used a post hoc

232 approach to compare SNP counts in the evolved and ancestral populations (Model 1:  $\text{glm}(\text{SNP} \sim$   
233 regime), linear hypothesis test:  $\text{Anc} - \text{Evolved}_{\text{regime}} = 0$ ) and identified 3,461 significant SNPs  
234 after a Bonferroni correction ( $p < 7.43e-6$ ). The significance trends of Model 1 (File S4) support  
235 the more robust findings of Model 2 (File S5). Here we fit independent models for each regime  
236 that included sampling at two intermediate generations (Model 2:  $\text{glm}(\text{SNP}_{\text{regime}} \sim \text{time})$ ). In  
237 Model 2, we identified 160 non-overlapping significance peaks across the five autosomes and the  
238 X chromosome, indicating that male reproductive success is polygenic (Fig 3, File S6).  
239 Significance peaks showed a strong chromosome arm-center structure, likely driven by the  
240 higher density of SNPs on the chromosome arms (Fig S2). Thirty-one peaks were shared across  
241 all regimes (Fig 3, Fig S4). The BS-PO regime had the highest number of significant SNPs ( $n =$   
242 1,994) as well as the highest number of unique significance peaks ( $n = 32$ ). The WS-PO regime  
243 and the shared WS-PO and BS-PO regimes represent the third and fourth highest groupings,  
244 reinforcing that isolated gametic sexual selection resulted in a strong polygenic genomic  
245 response (Fig S4). The WS-P&P regime had the fewest number of significance peaks and only  
246 three peaks were unique to this regime.

247 Linkage disequilibrium was low between SNPs and significance peaks could be narrowed  
248 down to small genomic regions (File S6). The median peak width was 362.5 base pairs. The  
249 largest peak spanned a 10,753 base pair region on the right arm of Chromosome I and lies in the  
250 intron of gene C17H1.2 (Fig S5). This gene exhibits male-biased expression, though its function  
251 is uncharacterized [30]. The majority of significance peaks ( $n = 108$ ) fell within a genic region,  
252 while 26 peaks were intergenic (File S6). Twenty-three peaks were located in pseudogenes and  
253 an additional three peaks overlapped with coding genes and pseudogenes.

254 To determine the functional pathways underlying improved male reproductive success,  
255 we examined the gene ontology (GO) terms associated with the genes underlying significance  
256 peaks (Fig S6; File S6). The most common molecular function identified was SCF ubiquitin  
257 ligase complex formation through F-box proteins ( $n = 16$ ). Several genes were also related to  
258 each carbohydrate binding, G-coupled protein receptor activity, and transferase transporter  
259 activity. Six genes were associated with some form of RNA. However, 47.5% of genes were  
260 uncharacterized in function, identifying a lack of male-specific functional knowledge.

261

## 262 Discussion

263 Quantifying the balance of pre- and post-insemination selection is critical for understanding how  
264 male reproductive fitness is comprised and how reproductive success evolves. This knowledge  
265 translates to better understanding how sexual selection contributes to population adaptation. We  
266 took a direct approach to isolate post-insemination from pre-insemination dynamics by coupling  
267 transgenic induction systems within an experimental evolution framework to examine whether  
268 these reproductive phases contribute in an additive or antagonistic manner to male reproductive  
269 fitness. All treatments showed a strong, rapid response to selection at both the phenotypic and  
270 genomic levels (Fig 2 and 3). Phenotypic results indicate that post-insemination selection was the  
271 major driver of male evolution. Genomic results support the importance of post-insemination  
272 selection and suggest that selection during this phase increased the efficacy of selection.  
273 Additionally, reproductive success is a highly polygenic trait with genes on all chromosomes  
274 contributing to the response to selection. These results provide new insights on the complexity of  
275 post-insemination dynamics and highlight the importance of considering all phases of  
276 reproduction.

277         The balance between pre- and post-insemination selection was complex and depended on  
278 the strength of selection imposed. At the phenotypic level, the within-strain competition  
279 treatments suggest that pre- and post-insemination act in an additive manner to increase male  
280 reproductive fitness (Fig 2). However, this pattern does not hold under enhanced between-strain  
281 competitive conditions. Instead, contrary to expectation, increased male-male competition (BS-  
282 P&P) decreased the rate of adaptation relative to base levels (WS-P&P). These increased  
283 competitive interactions could potentially harm females as a byproduct (i.e., sexual conflict) and  
284 therefore reduce female reproductive rate. However, the BS-PO treatment had the same number  
285 of males attempting to mate with females as the BS-P&P, the difference being that the BS-PO  
286 males could not transfer sperm post-mating. Thus, the increased number of males actually  
287 inseminating females is likely the contributing source of the decreased evolutionary response.  
288 While it seems possible that increased competition among sperm led to the decrease in fecundity  
289 [31], it is also possible that females altered egg-laying rates in response to the amount of sperm  
290 present as a result of a resource trade-off between reproductive and maintenance functions. To  
291 our knowledge, no studies have quantified this relationship in nematodes.

292         In contrast, increased sperm competition appeared to improve the rate of adaptation in  
293 males. BS-PO males trended towards the highest rate of increase in post-insemination success

294 and post-insemination contributed the most to their overall reproductive response. While these  
295 comparative trends were not significant at the phenotypic level, at the genomic level populations  
296 evolved under increased sperm competition had the strongest genomic response across dozens of  
297 genes (Fig 3 and S4). Interestingly, populations evolved under reduced sperm competitive  
298 dynamics (WS-PO) also showed a strong genomic response, suggesting that isolating post-  
299 insemination dynamics from pre-insemination dynamics allowed sexual selection to act more  
300 efficiently. While we isolated post-insemination through transgenic induction, this type of effect  
301 could be seen in nature if females were to mate with males over distinct periods of time and store  
302 sperm for later use.

303 Our method of population construction generated little haplotype structure, which  
304 allowed us to map genetic elements that responded to selection with high precision. A challenge  
305 in many quantitative trait loci [32] and evolve-and-resequence studies [33] is narrowing down  
306 the regions of selection to make specific statements on the genetic architecture of traits. In  
307 contrast, here we have high confidence that reproductive success and sperm competitive success  
308 are complex traits underlaid by over 60 genes (Fig 3 and S4). In most cases, we were able to  
309 narrow the region under selection to just a few hundred base pairs. While this precision should in  
310 principle allow us to identify the causal basis of the genetic response, given the highly polygenic  
311 structure of these complex traits, each contributing gene likely contributes a small effect, which  
312 makes the next step of functional molecular characterization challenging. To help prioritize this  
313 process, we performed a GO analysis to look for patterns in molecular functions or biological  
314 processes (Fig S6). F-box proteins involved in protein-protein interactions, such as ubiquitin-  
315 ligase complex formation [34], showed a strong response in all treatments. Though their exact  
316 function is unknown, many of the several hundred *C. elegans* F-box genes show signatures of  
317 positive selection in wild isolates, suggesting that selective conditions observed in nature were  
318 mimicked in the lab [35]. However, nearly half of the identified genes were uncharacterized in  
319 function, despite *C. elegans* being a major model system. These genes represent a candidate list  
320 for future molecular studies to characterize the networks underlying male reproductive function.  
321 In particular, gene C17H1.2 is of interest for future study as it has a large significance peak  
322 falling within the second intron and exhibits male-biased expression patterns.

323 Sexual selection has a large effect on population size by limiting the number of  
324 successfully breeding adults [reviewed in 36]. We estimated the effective population size to be



325 less than one quarter of the enforced census size. If one assumes that nearly all females are mated  
326 as an upper bound, this difference suggests that on average approximately 10% of males sired all  
327 offspring (Fig S3). This is the very definition of opportunity for sexual selection [7] and is  
328 consistent with our conclusion that strong sexual selection acted on these populations even in the  
329 base level treatment (WS-P&P). Interestingly, the effective population size of the X chromosome  
330 was larger than expected given the XX/XO sex determination system of *Caenorhabditis*  
331 nematodes, which would suggest that the effective population size of the X chromosome should  
332 be 3/4 that of the autosomes under neutral expectations. The flip in the  $N_e$  ratio between the X  
333 and autosomes is further evidence that the response to selection is driven by sexual interactions  
334 among males, as the X chromosome is in males 1/3 of the time while autosomes are in males 1/2  
335 the time, and so the autosomes are more susceptible to drift induced by variance in mating  
336 success specially among males [36,37]. Interestingly, the X chromosome also had the fewest  
337 number of significance peaks, so in addition to the demography of the X chromosome itself, it is  
338 also possible that there may be additional reductions in autosomal variation due hitchhiking [36].

339 Darwin first noted that the existence of elaborate sex-specific traits seemed at odds with  
340 regular evolutionary processes, and more than a hundred of years of research has subsequently  
341 focused on understanding how sexual selection drives diversity for these traits within and  
342 between populations. Our work indicates that the cryptic phenotypes and molecular effects that  
343 emerge during post-insemination interactions are equally important in determining fertilization  
344 success and likely to be just as genetically complex.

345

## 346 **Materials and methods**

### 347 **Molecular biology**

348 Guides targeting sequences in the same intergenic regions utilized by the ttTi4348 and ttTi5605  
349 MosSCI sites have been previously described [19,38]. Additional guide sequences were chosen  
350 using the Benchling CRISPR design tool, based on the models of Doench *et al.* [39] and Hsu *et*  
351 *al.* [40], and the Sequence Scan for CRISPR tool [41]. Guides were inserted into pDD162  
352 (Addgene #47549) [42] using the Q5 site-directed mutagenesis kit (NEB) or ordered as  
353 cr:tracrRNAs from Synthego. A complete list of guide sequences can be found in Table S1.

354 Repair template plasmids were assembled using the NEBuilder HiFI Kit (NEB) from a  
355 combination of restriction digest fragments and PCR products. PCR products were generated  
356 using the 2x Q5 PCR Master Mix (NEB) in accordance with manufacturer instructions. Details  
357 of plasmid construction can be found in the supplemental methods and Tables S2 and S3.  
358 Plasmids were purified using the ZR Plasmid Miniprep kit (Zymo) and all plasmid assembly  
359 junctions were confirmed by Sanger sequencing.

## 360 **Strain generation**

361 All strains used in this study are listed in Table S4 and depicted schematically in Figure S1.  
362 Insertion of transgenes was done by CRISPR/Cas9 using standard methods. Briefly, a mixture of  
363 10ng/μl repair template plasmid, 50ng/μl plasmid encoding CAS9 and the guide RNA and  
364 2.5ng/μl pCFJ421 (Addgene #34876) [43] was injected into the gonad of young adult  
365 hermaphrodites. Where hygromycin resistance (HygR) was used as a selectable event, two to  
366 three days after injection, hygromycin B (A.G. Scientific, Inc.) was added to the plates at a final  
367 concentration of 250μg/ml. Successful insertion was confirmed by PCR and Sanger sequencing.

368 To generate the male sterility induction strain PX624, *pie-1p::TIR-1* was inserted into the  
369 Chromosome I site and a degron tag was added to the native *spe-44* locus of JU2526 as in  
370 Kasimatis *et al.* [19] (Fig S1A, C). The majority of exons 2-4 of the native *fog-2* gene were then  
371 deleted using the guides and oligonucleotide repair template listed in Table S1 and Table S3.  
372 Microinjections and *dpy-10* co-marker screening were done as previously described [19,44]. This  
373 strain represents the predecessor for the experimental evolution ancestral population (see  
374 “Generating genetic diversity”).

375 The *hsp-16.41p::PEEL-1 + rpl-28p::mKate2 + rps-0p::HygR* three gene cassette was  
376 inserted into the Chromosome I site of CB4856. Individuals with confirmed inserts were crossed  
377 to JK574, containing *fog-2(q71)*, and backcrossed 4 times to CB4856 (Fig S1B). A single pair  
378 was then chosen for 14 generations of inbreeding to create strain PX626. To introduce a second  
379 copy of *hsp-16.41p::PEEL-1*, a *hsp-16.41p::PEEL-1 + loxP::rps-0p::HygR::loxP* two gene  
380 cassette was inserted into the Chromosome II site (Fig S1). The HygR gene was then removed by  
381 injection of a CRE expressing plasmid pZCS23 [45] at 10ng/μl, with removal monitored by

382 PCR, to generate PX630. PX626 was crossed to PX630 to generate the final novel, bioassay  
383 competitor strain PX631 (Fig S1E).

384 To generate a lethality and male sterility induction strain, PX624 was crossed with  
385 PX631 and then backcrossed 5 times with PX624 to introgress *hsp-16.41p::PEEL-1* in the  
386 Chromosome II site to create strain PX655. Since the Chromosome I site of PX624 is occupied  
387 by *pie-1p::TIR-1*, CRISPR/Cas9 was used to insert the *hsp-16.41p::PEEL-1 + rpl-28p::mKate2*  
388 + *rps-0p::HygR* three gene cassette into PX624 at a site on Chromosome III between *nac-3* and  
389 K08E5.5 that has not been previously used for transgene insertion, creating PX656. PX655 and  
390 PX656 were then crossed to create the final competitor strain PX658 (Fig S1D).

### 391 **Generating genetic diversity**

392 The male sterility induction strain (PX624) was exposed to ethyl methanesulfonate (EMS) to  
393 induce genetic variation (Fig S1). Populations of 8,000-10,000 age-synchronized L4 worms were  
394 divided into 4 technical replicates and suspended in M9 buffer. Worms were incubated in 12.5  
395 mM EMS for 4 hours at 20°C, after which they were rinsed in M9 buffer and plated on NGM-  
396 agar plates. Replicate populations were given two recovery and growth generations with ample  
397 food following a mutagenesis event. A total of five low-dose mutagenesis rounds coupled with  
398 recovery generations were performed. During each of the recovery rounds, a subset of worms  
399 from each replicate were screened on NGM-agar plates containing 1 mM indole-3-acetic acid  
400 (Auxin, Alfa Aesar) following Kasimatis *et al.* [19] to test if mutagenesis had compromised the  
401 integrity of the sterility induction system. Specifically, if eggs were observed on an auxin-  
402 containing plate, then that replicate was removed and another replicate was subdivided, so a total  
403 of four replicate populations were always maintained.

404 After the final round of mutagenesis and recovery, replicate populations were maintained  
405 for five generations of lab adaptation. They were then combined for an additional 10 generations  
406 of lab adaptation with a population size of approximately 30,000 worms. The integrity of the  
407 sterility induction system continued to be screened every two generations throughout the entire

408 lab adaptation process. This genetically diverse, male sterility induction strain PX632 represents  
409 the ancestral experimental evolution population (Fig S1).

## 410 **Experimental design and worm culture**

411 The ancestral population (PX632) was divided into four experimental regimes, which varied  
412 based on total (i.e., pre- and post-insemination) or sperm (i.e., post-insemination) competition  
413 dynamics occurring either within the evolving strain alone or between the evolving strain and  
414 competitor strain (PX658): within-strain pre- and post-insemination competition (WS-P&P),  
415 within-strain post-insemination only competition (WS-PO), between-strain pre- and post-  
416 insemination competition (BS-P&P), and between-strain post-insemination only competition  
417 (BS-PO).

418 Each regime had six replicate populations ~~and experimentally~~ evolved for 30 generations.  
419 Ten selective events occurred over the course of experimental evolution denoted by the induction  
420 of sterility, the addition of competitors, and the induction of sterility and addition of competitors  
421 in the WS-PO, BS-P&P, and BS-PO regimes, respectively (Fig 1 & Fig 2A). The WS-P&P had  
422 no direct selection applied. Each selective event was followed by a recovery generation, where  
423 no direct selection was applied, to allow the populations to return to the census size. During the  
424 recovery generation, a subset of worms from the regimes with sterility induction were screened  
425 on auxin-containing plates to ensure the sterility induction system was functional. Additionally, a  
426 subset of worms from all replicates was frozen for future stocks. The detailed selection  
427 procedure follows.

428 To start each selective event age synchronized L1 worms were plated onto five 10 cm  
429 NGM-agar plates seeded with OP50 *Escherichia coli* at 20°C with a density of 1,000 worms per  
430 plate, giving a census size of 5,000 worms per replicate per regime [46,47]. Forty-eight hours  
431 later, experimental regimes with sterility induction (WS-PO and BS-PO) were transferred to  
432 NGM-agar plates containing 1mM auxin. Experimental regimes without sterility induction (WS-  
433 P&P and BS-P&P) were transferred to fresh NGM-agar plates. For all transfers, worms within a  
434 replicate were pooled and then redistributed across five plates with a density of 1,000 worms per  
435 plate. After 24 hours, males from the competitor strain PX658 were filter-separated from females  
436 using a 35 um Nitex nylon filter and added to experimental regimes with competition at a mean  
437 density of 200 competitor males per plate (evolving to competitor ratio of 1:2.5). After another  
438 24 hours, eggs were collected from all replicates, hatched, and age synchronized. To ensure that

439 only progeny from the evolving males and not from the competitor males were being propagated,  
440 larval lethality of competitor progeny was induced following Seidel *et al.* [22]. Briefly,  
441 approximately 5,000 L3 worms were suspended in 5 mL of S-Basal and heat-shocked in a 35°C  
442 sealed water bath for 2.5 hours to activate ectopic expression of the lethal protein PEEL-1. After  
443 heat-shock, worms were plated on NGM-agar plates to end the selective event. All experimental  
444 regimes were subjected to the heat-shock procedure, even if competitor worms were not added.

445 A subset of approximately 200 worms from the competition and sterility and competition  
446 regimes were removed prior to heat-shock and fluorescence screened to determine the proportion  
447 of progeny coming from the competitor worms, which expressed red fluorescent protein (RFP),  
448 versus the evolving worms, which had no fluorescence.

449 The competitor strain PX658 was maintained on NGM-agar plates seeded with OP50 *E.*  
450 *coli* at 20°C in population sizes of approximately 20,000 worms. The competitor strain was reset  
451 from freezer stocks every 3 weeks (~4 generations) to prevent adaptation and maintain a constant  
452 competitive phenotype.

## 453 **Fertility assays**

454 We assayed the fertility of the ancestor and all the evolved replicates (N = 13 populations) to  
455 determine the total competitive reproductive success of males as well as their sperm competitive  
456 success. The assay conditions mimicked the environment under which worms evolve. Total  
457 competitive reproductive success was assessed by adding the novel competitor PX631 in equal  
458 proportion to evolving males. Sperm competitive success was assessed by inducing sterility of  
459 the evolving male before adding the novel competitor in equal proportion to evolving males. The  
460 use of the novel competitor and high competition ratio acted as a “stress-test” of male  
461 competitive ability. Both assays were performed with a population of 250 evolving females, 250  
462 evolving males, and 250 novel competitors. After a 24-hour competition period, eggs were  
463 collected, hatched, and age synchronized for screening. At least 200 L3 progeny were counted  
464 for each assay and then fluorescence-screened for the proportion of progeny coming from  
465 evolving (RFP minus) or competitor (RFP plus) males. Three independent biological replicates  
466 were done for each assay across all experimental evolution replicates (File S7).

467 Fertility data were analyzed using the R statistical language v4.0.0 [48]. An equality of  
468 proportions test was performed on the ancestral data to determine if ancestral males sired half the  
469 total progeny under total competitive and sperm competitive conditions. The evolved male

470 fertility data were analyzed using a linear model (GLM) framework with random effects using  
471 the *lme4* v.1.13 package [49]. The *multcomp* package [50] was then used to perform a planned  
472 comparisons tests with defined contrasts to determine if: i) evolutionary change from the  
473 ancestral population occurred, and ii) experimental evolution under direct sexual selection  
474 affected reproductive success differently than baseline selection alone (i.e., WS-P&P).

## 475 **Genome sequencing, mapping, and SNP calling**

476 We performed whole-genome sequencing on pooled samples of 2,000-3,000 L1 worms from  
477 generations 0, 13, 22, and 31. Three independent pooled extractions were done for the ancestral  
478 population (i.e., generation 0) to capture as many segregating variants as possible. Worms were  
479 flash frozen and DNA was isolated using Genomic DNA Clean and Concentrator-10 (Zymo).  
480 Libraries were prepared using the Nextera DNA Sample Prep kit (Illumina) starting from 5 ng of  
481 DNA. 100 bp paired-end reads were sequenced on an Illumina HiSeq 4000 at the University of  
482 Oregon Genomics and Cell Characterization Core Facility (Eugene, OR). The average genome-  
483 wide sequencing coverage for generations 0, 13, 22, and 31 was 162×, 24×, 26×, 50×,  
484 respectively.

485 Reads were trimmed using skewer v0.2.2 [51] to remove low quality bases (parameters: -  
486 x CTGTCTCTTATA -t 12 -l 30 -r 0.01 -d 0.01 -q 20). The trimmed reads were mapped to the *C.*  
487 *elegans* N2 reference genome (PRJNA13758-WS274) [30] using BWA-MEM v0.7.17  
488 (parameters: -t 8 -M) [52] and then sorted using SAMtools v1.5 [53]. We removed PCR  
489 duplicates with MarkDuplicates in Picard v2.6.0 (<https://github.com/broadinstitute/picard>),  
490 realigned insertions/deletions with IndelRealigner in GATK v3.7  
491 (<https://github.com/broadinstitute/gatk/#authors>), and called variants with mpileup in bcftools  
492 v1.5 [54]. The mpileup file was then converted to a genotype-called vcf file, insertions/deletions  
493 were removed, and the allelic depth was extracted for all biallelic SNPs for further analysis.

494 To improve the reliability of the analysis pipeline, additional filtering was done using R  
495 [48]. Repeat regions were masked based the *C. elegans* N2 reference  
496 (<https://gist.github.com/danielecook/cfaa5c359d99bcad3200>) and SNPs in the upper and lower  
497 5% tails of the total coverage distribution (i.e., >342× and ≤20×, respectively) were removed.  
498 This yielded a total of 326,648 SNPs to be considered for analyses.

## 499 **Estimation and candidate SNP inference**

500 Genetic diversity summary statistics were estimated for the ancestral population from 32,299  
501 SNPs. Coverage-weighted average heterozygosity ( $\pi$ ) was calculated following Begun et al. [55].  
502 SNP density ( $\theta_w$ ) was calculated across 1kb sliding windows. We performed a Kolmogorov-  
503 Smirnov test to determine if the site frequency spectrum,  $\pi$ , and  $\theta_w$  differed between  
504 chromosome arm domains and center domains [25]. Effective population size ( $N_e$ ) was  
505 calculated per chromosome for each of the evolved regime replicates following Waples [56] Plan  
506 II sampling [57]. An analysis of variance was performed in R to determine if the genome-wide  
507  $N_e$  differed between regimes and Welch's Two-Sample t-test was performed to determine if the  
508 estimated  $N_e$  on autosomes differed from the X chromosome. We estimated the upper bound on  
509 the number of breeding males ( $N_m$ ) by solving the equation  $N_e = (4 N_m N_f) / (N_m + N_f)$  for  $N_m$   
510 using the estimated effective population sizes and assuming that all females reproduced ( $N_f =$   
511 2,500).

512 Allele count data were analyzed using R [48] following two complementary models.  
513 Model 1 fit allele counts for ancestral and evolved populations using a generalized linear mixed  
514 model with a binomial logistic distribution:  $\text{glm}(\text{SNP} \sim \text{regime})$ . The SNP data going into Model  
515 1 were filtered to ensure each SNP was present in the ancestor and at least ten of the evolved  
516 replicates. A total of 263,373 SNPs fit the full model (File S4). The *multcomp* package [50] was  
517 then used to perform a planned comparisons tests with defined contrasts to determine if  
518 experimental evolution under direct sexual selection affects the genome differently than baseline  
519 selection alone (i.e., WS-P&P). Model 2 fit allele counts across all time points for each regime  
520 separately, again using a generalized linear mixed model with a binomial logistic distribution:  
521  $\text{glm}(\text{SNP}_{\text{regime}} \sim \text{time})$ . The SNP data going into Model 2 were filtered to ensure each SNP was  
522 present in the ancestor and at least nine occurrences across replicates and time points. A total of  
523 202,926 SNPs, 222,731 SNPs, 200,324 SNPs, and 204,946 SNPs fit the full model for the WS-  
524 P&P, WS-PO, BS-P&P, and BS-PO regimes, respectively (File S5). For both models,  
525 significance was determined using a genome-wide Bonferroni cut-off.

526 A significance peak was called if five or more significant SNPs fell in a 1kb window.  
527 Peaks were classified as occurring within a gene (intragenic) or between genes (intergenic) using  
528 JBrowse in WormBase [30]. If multiple 1kb windows fell within a single gene, then the windows  
529 were combined and called as a single intragenic peak. The molecular and biological functions of

530 the associated genes were determined using gene ontology analysis in UniProt [58] and  
531 QuickGO [59].

## 532 **Data accessibility**

533 The oligonucleotides and synthetic constructs used in this study are available as Supplemental  
534 Tables S1-S3. The sequence data will be made publicly available on NCBI prior to publication.  
535 Model summary statistics for the genomic analyses (Files S1-S6) and the fertility data (File S7)  
536 are available in the Figshare repository <https://figshare.com/s/735e8011f9a1239a5c85>, which  
537 will be made public upon acceptance.. All R scripts are available via the GitHub repository  
538 [https://github.com/katjakasimatis/postinsemination\\_expevol](https://github.com/katjakasimatis/postinsemination_expevol). Worm strains PX624, PX631, and  
539 PX658 will be made available from the *Caenorhabditis* Genetics Center. All other strains are  
540 available from the Phillips Lab upon request.

541

542

543

## 544 **Acknowledgements**

545 We thank Brennen Jamison, Erik Johnson, and Christine Sedore for assistance during  
546 experimental evolution and Anastasia Teterina for advice on the genomic analyses. We thank  
547 Levi Morran, Bill Rice, Locke Rowe, and the Phillips lab for their helpful discussion. This work  
548 was conducted in part using the resources of the University of Oregon Genomics and Cell  
549 Characterization Core Facility and Research Advanced Computing Services.

550

551

## 552 **Funding**

553 This work was funded by National Institutes of Health grant R35GM131838 to PCP. KRK is  
554 supported by a Natural Sciences and Engineering Research Council of Canada Banting  
555 Postdoctoral Fellowship. The funders had no role in study design, data collection and analysis,  
556 decision to publish, or preparation of the manuscript.

557

558



## 559 **Author contributions**

560 KRK and PCP devised the project. KRK and MJMS created the strains. KRK collected the  
561 experimental evolution data with assistance from RL and AS. JHW prepared the genomic  
562 libraries. KRK analyzed the data. KRK and PCP wrote the manuscript with the support of the  
563 other authors.

564

565

## 566 **References**

- 567 1. Andersson M. *Sexual Selection*. New York: Princeton University Press; 1994.
- 568 2. Lewontin R. The units of selection. *Annu Rev Ecol Syst.* 1970;1: 1–18.
- 569 3. Immler S, Otto SP. The Evolutionary Consequences of Selection at the Haploid Gametic  
570 Stage. *Am Nat.* 2018;192: 241–249.
- 571 4. Lorch PD, Stephen Proulx, Rowe L, Day T. Condition-dependent sexual selection can  
572 accelerate adaptation. *Evol Ecol Res.* 2003;5: 867–881.
- 573 5. Candolin U, Heuschele J. Is sexual selection beneficial during adaptation to environmental  
574 change? *Trends Ecol Evol.* 2008;23: 446–452.
- 575 6. Lande R. Models of speciation by sexual selection on polygenic traits. *Proc Natl Acad Sci*  
576 *USA.* 1981;78: 3721–3725.
- 577 7. Arnold SJ, Wade MJ. On the measurement of natural and sexual selection: theory.  
578 *Evolution.* 1984;38: 709–719.
- 579 8. Evans JP, Garcia-Gonzalez F. The total opportunity for sexual selection and the  
580 integration of pre- and post-mating episodes of sexual selection in a complex world. *J*  
581 *Evol Biol.* 2016;29: 2338–2361.
- 582 9. Pischedda A, Rice WR. Partitioning sexual selection into its mating success and  
583 fertilization success components. *Proc Natl Acad Sci USA.* 2012;109: 2049–2053.
- 584 10. Rose E, Paczolt KA, Jones AG. The contributions of premating and postmating selection  
585 episodes to total selection in sex-role-reversed Gulf pipefish. *Am Nat.* 2013;182: 410–420.
- 586 11. Marie-Orleach L, Janicke T, Vizoso DB, David P, Schärer L. Quantifying episodes of  
587 sexual selection: Insights from a transparent worm with fluorescent sperm. *Evolution.*  
588 2016;70: 314–328.

- 589 12. Devigili A, Evans JP, Di Nisio A, Pilastro A. Multivariate selection drives concordant  
590 patterns of pre- and postcopulatory sexual selection in a livebearing fish. *Nat Commun.*  
591 2015;6: 1–9.
- 592 13. Collet J, Richardson DS, Worley K, Pizzari T. Sexual selection and the differential effect  
593 of polyandry. *Proc Natl Acad Sci USA.* 2012;109: 8641–8645.
- 594 14. Turnell BR, Shaw KL. High opportunity for postcopulatory sexual selection under field  
595 conditions. *Evolution.* 2015;69: 2094–2104.
- 596 15. Pélissié B, Jarne P, Sarda V, David P. Disentangling precopulatory and postcopulatory  
597 sexual selection in polyandrous species. *Evolution.* 2014;68: 1320–1331.
- 598 16. Begun DJ, Whitley P, Todd BL, Waldrip-Dail HM, Clark AG. Molecular population  
599 genetics of male accessory gland proteins in *Drosophila*. *Genetics.* 2000;156: 1879–1888.
- 600 17. Swanson WJ, Vacquier VD. Reproductive Protein Evolution. *Annu Rev Ecol Syst.*  
601 2002;33: 161–179.
- 602 18. Stewart AD, Phillips PC. Selection and maintenance of androdioecy in *Caenorhabditis*  
603 *elegans*. *Genetics.* 2002;160: 975–982.
- 604 19. Kasimatis KR, Moerdyk-Schauwecker MJ, Phillips PC. Auxin-mediated sterility  
605 induction system for longevity and mating studies in *Caenorhabditis elegans*. *G3.* 2018;8:  
606 2655–2662.
- 607 20. Schlötterer C, Kofler R, Versace E, Tobler R, Franssen SU. Combining experimental  
608 evolution with next-generation sequencing: a powerful tool to study adaptation from  
609 standing genetic variation. *Heredity.* 2015;114: 431–440.
- 610 21. Teotonio H, Estes S, Phillips PC, Baer CF. Experimental Evolution with *Caenorhabditis*  
611 *Nematodes*. *Genetics.* 2017;206: 691–716.
- 612 22. Seidel HS, Ailion M, Li J, van Oudenaarden A, Rockman MV, Kruglyak L. A novel  
613 sperm-delivered toxin causes late-stage embryo lethality and transmission ratio distortion  
614 in *C. elegans*. *PLoS Biol.* 2011;9: e1001115–21.
- 615 23. Gengyo-Ando K, Mitani S. Characterization of mutations induced by ethyl  
616 methanesulfonate, UV, and trimethylpsoralen in the nematode *Caenorhabditis elegans*.  
617 *Biochem Biophys Res Commun.* 2000;269: 64–69.
- 618 24. Cutter AD, Baird SE, Charlesworth D. High nucleotide polymorphism and rapid decay of  
619 linkage disequilibrium in wild populations of *Caenorhabditis remanei*. *Genetics.*  
620 2006;174: 901–913.
- 621 25. Rockman MV, Kruglyak L. Recombinational Landscape and Population Genomics of  
622 *Caenorhabditis elegans*. *PLoS Genetics.* 2009;5: e1000419–16.

- 623 26. Lee D, Zdraljevic S, Stevens L, Wang Y, Tanny RE, Crombie TA, et al. Balancing  
624 selection maintains ancient genetic diversity in *C. elegans*. bioRxiv. 2020: 1–41.  
625 doi:10.1101/2020.07.23.218420
- 626 27. Andersen EC, Gerke JP, Shapiro JA, Crissman JR, Ghosh R, Bloom JS, et al.  
627 Chromosome-scale selective sweeps shape *Caenorhabditis elegans* genomic diversity. Nat  
628 Rev Genet. 2012;44: 285–290.
- 629 28. Lande R. Sexual dimorphism, sexual selection, and adaptation in polygenic characters.  
630 Evol. 1980;34: 292–305.
- 631 29. Crow JF, Kimura M. An introduction to population genetics theory. New York: Harper  
632 and Rowe; 1970.
- 633 30. Harris TW, Arnaboldi V, Cain S, Chan J, Chen WJ, Cho J, et al. WormBase: a modern  
634 Model Organism Information Resource. Nucleic Acids Res. 2019;gkz920.
- 635 31. Holland B, Rice WR. Experimental removal of sexual selection reverses intersexual  
636 antagonistic coevolution and removes a reproductive load. Proc Natl Acad Sci USA.  
637 1999;96: 5083–5088.
- 638 32. Mackay TFC, Stone EA, Ayroles JF. The genetics of quantitative traits: challenges and  
639 prospects. Nat Rev Genet. 2009;10: 565–577.
- 640 33. Otte KA, Nolte V, Mallard F, Schlötterer C. The adaptive architecture is shaped by  
641 population ancestry and not by selection regime. bioRxiv. 2020;1–38.  
642 doi:10.1101/2020.06.25.170878
- 643 34. Kipreos ET, Pagano M. The F-box protein family. Genome Biol. 2000;1: 3002.1–3002.7.
- 644 35. Ma F, Lau CY, Zheng C. Large genetic diversity and strong positive selection in F-box  
645 and GPCR genes among the wild isolates of *Caenorhabditis elegans*. Genome Biol Evol.  
646 2021;13: evab048.
- 647 36. Charlesworth B. Fundamental concepts in genetics: effective population size and patterns  
648 of molecular evolution and variation. Nat Rev Genet. 2009;10: 195–205.
- 649 37. Corl A, Ellegren H. The genomic signature of sexual selection in the genetic diversity of  
650 the sex chromosomes and autosomes. Evol. 2012;66: 2138–2149.
- 651 38. Dickinson DJ, Pani AM, Heppert JK, Higgins CD, 2015. Streamlined genome engineering  
652 with a self-excising drug selection cassette. Genetics. 2015;200: 1035–1049.
- 653 39. Doench JG, Fusi N, Sullender M, Hegde M, Vaimberg EW, Donovan KF, et al. Optimized  
654 sgRNA design to maximize activity and minimize off-target effects of CRISPR-Cas9. Nat  
655 Biotechnol 2016 34:3. 2016;34: 184–191.

- 656 40. Hsu PD, Scott DA, Weinstein JA, Ran FA, Konermann S, Agarwala V, et al. DNA  
657 targeting specificity of RNA-guided Cas9 nucleases. *Nat Biotechnol* 2016 34:3. 2013;31:  
658 827–832.
- 659 41. Xu H, Xiao T, Chen C-H, Li W, Meyer CA, Wu Q, et al. Sequence determinants of  
660 improved CRISPR sgRNA design. *Genome Res.* 2015;25: 1147–1157.
- 661 42. Dickinson DJ, Ward JD, Reiner DJ, Goldstein B. Engineering the *Caenorhabditis elegans*  
662 genome using Cas9-triggered homologous recombination. *Nat Meth.* 2013;10: 1028–  
663 1034.
- 664 43. Frøkjær-Jensen C, Davis MW, Ailion M, Jorgensen EM. Improved Mos1-mediated  
665 transgenesis in *C. elegans*. *Nat Meth.* 2012;9: 117–118.
- 666 44. Paix A, Folkmann A, Rasoloson D, Seydoux G. High efficiency, homology-directed  
667 genome editing in *Caenorhabditis elegans* using CRISPR-Cas9 ribonucleoprotein  
668 complexes. *Genetics.* 2015;201: 47–54.
- 669 45. Stevenson ZC, Moerdyk-Schauwecker MJ, Jamison B, Phillips PC. Rapid self-selecting  
670 and clone-free integration of transgenes into engineered crispr safe harbor locations in  
671 *Caenorhabditis elegans*. *G3.* 2020;10: 3775–3782.
- 672 46. Brenner S. The genetics of *Caenorhabditis elegans*. *Genetics.* 1974;77: 71–94.
- 673 47. Kenyon C. The nematode *Caenorhabditis elegans*. *Science.* 1988;240: 1448–1453.
- 674 48. R Core Team. R: A language and environment for statistical computing [Internet]. Vienna,  
675 Austria: Foundation for Statistical Computing; 2020. Available: [https://www.R-](https://www.R-project.org/)  
676 [project.org/](https://www.R-project.org/)
- 677 49. Bates D, Mächler M, Bolker B, Walker S. Fitting linear mixed-effects models using lme4.  
678 *J Stat Soft.* 2015;67: 1–48.
- 679 50. Hothorn T, Bretz F, Westfall P. Simultaneous inference in general parametric models.  
680 *Biom J.* 2008;50: 346–363.
- 681 51. Jiang H, Lei R, Ding S-W, Zhu S. Skewer: a fast and accurate adapter trimmer for next-  
682 generation sequencing paired-end reads. *BMC Bioinformatics.* 2014;15: 182–12.
- 683 52. Li H. Aligning sequence reads, clone sequences and assembly contigs with BWA-MEM.  
684 arXiv. 2013;1303.3997v2: 1–3.
- 685 53. Li H, Handsaker B, Wysoker A, Fennell T, Ruan J, Homer N, et al. The Sequence  
686 Alignment/Map format and SAMtools. *Bioinformatics.* 2009;25: 2078–2079.
- 687 54. Danecek P, Schiffels S, Durbin R. Multiallelic calling model in bcftools (-m). 2016.  
688 Available at: <http://samtools.github.io/bcftools/call-m.pdf>

- 689 55. Begun DJ, Holloway AK, Stevens K, Hillier LW, Poh Y-P, Hahn MW, et al. Population  
690 genomics: whole-genome analysis of polymorphism and divergence in *Drosophila*  
691 *simulans*. PLoS Biol. 2007;5: e310.
- 692 56. Waples RS. A generalized approach for estimating effective population size from  
693 temporal changes in allele frequency. Genetics. 1989;121: 379–391.
- 694 57. Jónás Á, Taus T, Kosiol C, Schlötterer C, Futschik A. Estimating the effective population  
695 size from temporal allele frequency changes in experimental evolution. Genetics.  
696 2016;204: 723–735.
- 697 58. UniProt Consortium. UniProt: the universal protein knowledgebase in 2021. Nucleic  
698 Acids Res. 2021;49: D480–D489.
- 699 59. Huntley RP, Sawford T, Mutowo-Meullenet P, Shypitsyna A, Bonilla C, Martin MJ, et al.  
700 The GOA database: gene ontology annotation updates for 2015. Nucleic Acids Res.  
701 2015;43: D1057–63.

702

703 **Figures**

704

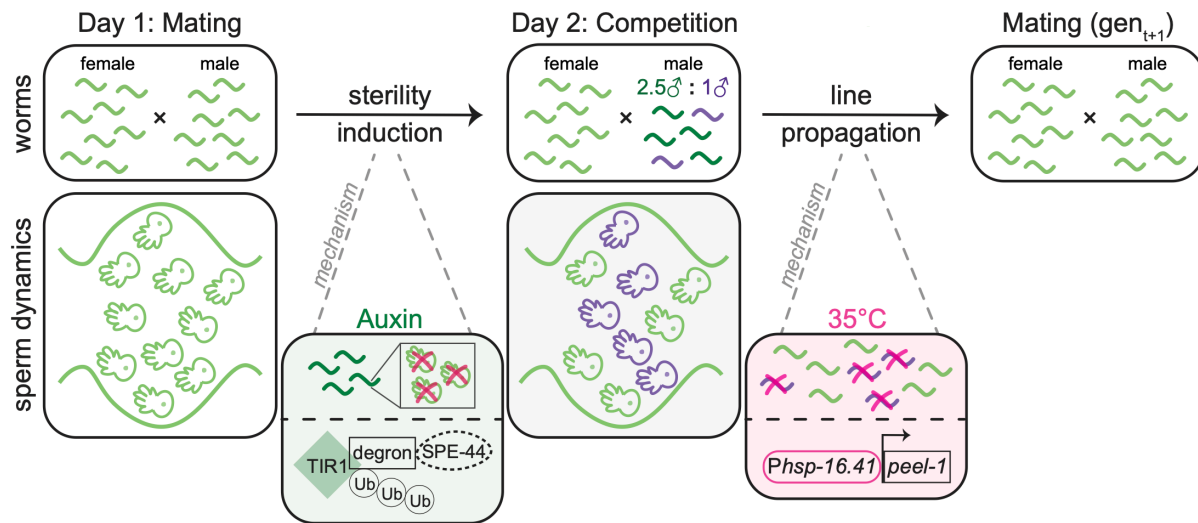

705

706 **Fig 1. Day-by-day depiction of the experimental evolution design shown at the population**  
 707 **level and at the sperm level.** On day 1 sterility is induced by transferring worms to auxin-  
 708 containing media. Auxin activates TIR1 to target the degron tag on SPE-44. The depletion of  
 709 SPE-44 stops the production of sperm thereby inducing sterility. On day 2, competitor males are  
 710 added to the population at a ratio of 1 competitor male to 2.5 evolving males. Progeny are  
 711 collected on day 3 and heat-shocked on day 4 to induce ectopic expression of the toxic protein  
 712 PEEL-1. This expression kills competitor cross-progeny, leaving only the progeny from sperm  
 713 transferred during the day 1 mating phase. Each selective event is followed by a recovery  
 714 generation.

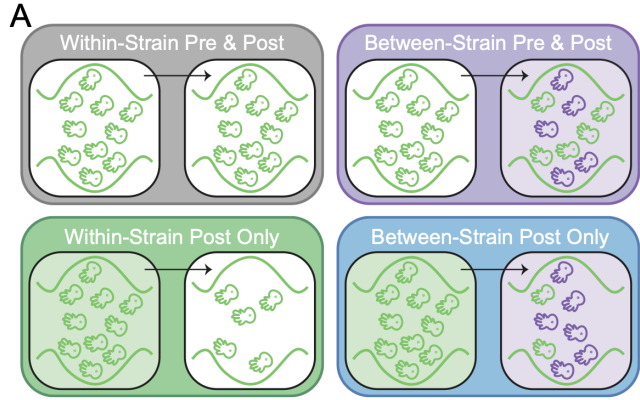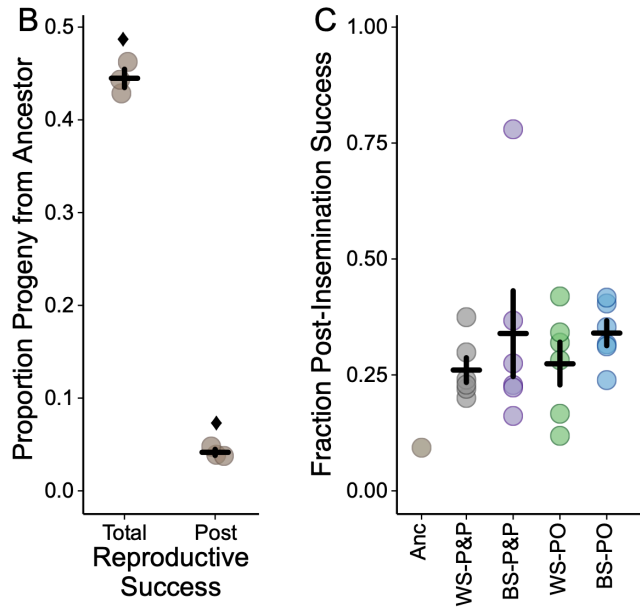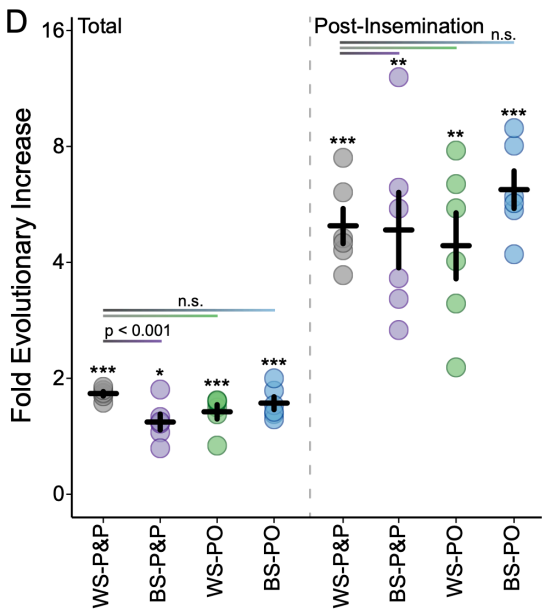

716 **Fig 2. The competitive reproductive success of males before and after experimental**  
717 **evolution under four sexual selection regimes. A)** Partitioning the sterility and competition  
718 treatments leads to four experimental evolution regimes: within-strain pre- and post-insemination  
719 competition (WS-P&P, gray), within-strain post-insemination only competition (WS-PO, green),  
720 between-strain pre- and post-insemination competition (BS-P&P, purple), and between-strain  
721 post-insemination only competition (BS-PO, blue). **B)** Ancestral males have poorer reproductive  
722 success than competitor males under both pre- and post-insemination competitive conditions  
723 (total) and under only post-insemination competitive conditions. Each point represents an  
724 independent assay with the mean and standard error across assays given. Diamonds denote a  
725 significant deviation from the null hypothesis of equal competitive ability between ancestral and  
726 competitive males for each condition (total:  $\chi^2 = 6.87$ , d.f. = 1,  $p < 0.01$ , 95% C.I. of ancestral  
727 competitive success = 40.4–48.6%; post-insemination:  $\chi^2 = 863$ , d.f. = 1,  $p < 0.0001$ , 95% C.I. of  
728 ancestral sperm competitive success = 3.0–5.5%). **C)** The fraction of total reproductive success  
729 attributable to post-insemination success in the ancestral population (Anc) and the evolved  
730 populations (WS-P&P, BS-P&P, WS-PO, BS-PO). Each point represents a mean of three  
731 independent assays for the ancestor and each evolved replicate with the mean and standard error  
732 across evolved replicates shown. **D)** The fold change in the total reproductive success and the  
733 post-insemination reproductive success of males in the evolved regimes relative to the ancestor  
734 (plotted on a  $\log_2$  scale). Males in all regimes significantly increased in both measures of  
735 reproductive success (\* $p < 0.05$ , \*\* $p < 0.01$ , \*\*\* $p < 0.001$ ). Post hoc tests for a difference  
736 between the WS-P&P and the BS-P&P, WS-PO, and BS-PO regimes are indicated by the  
737 horizontal lines. The only significant difference appears between the total reproductive success  
738 of the WS-P&P and BS-P&P regimes, in which pre-insemination competition reduces the  
739 evolutionary response. Each point represents a mean of three independent assays for each  
740 evolved replicate with the mean and standard error across replicates shown.  
741



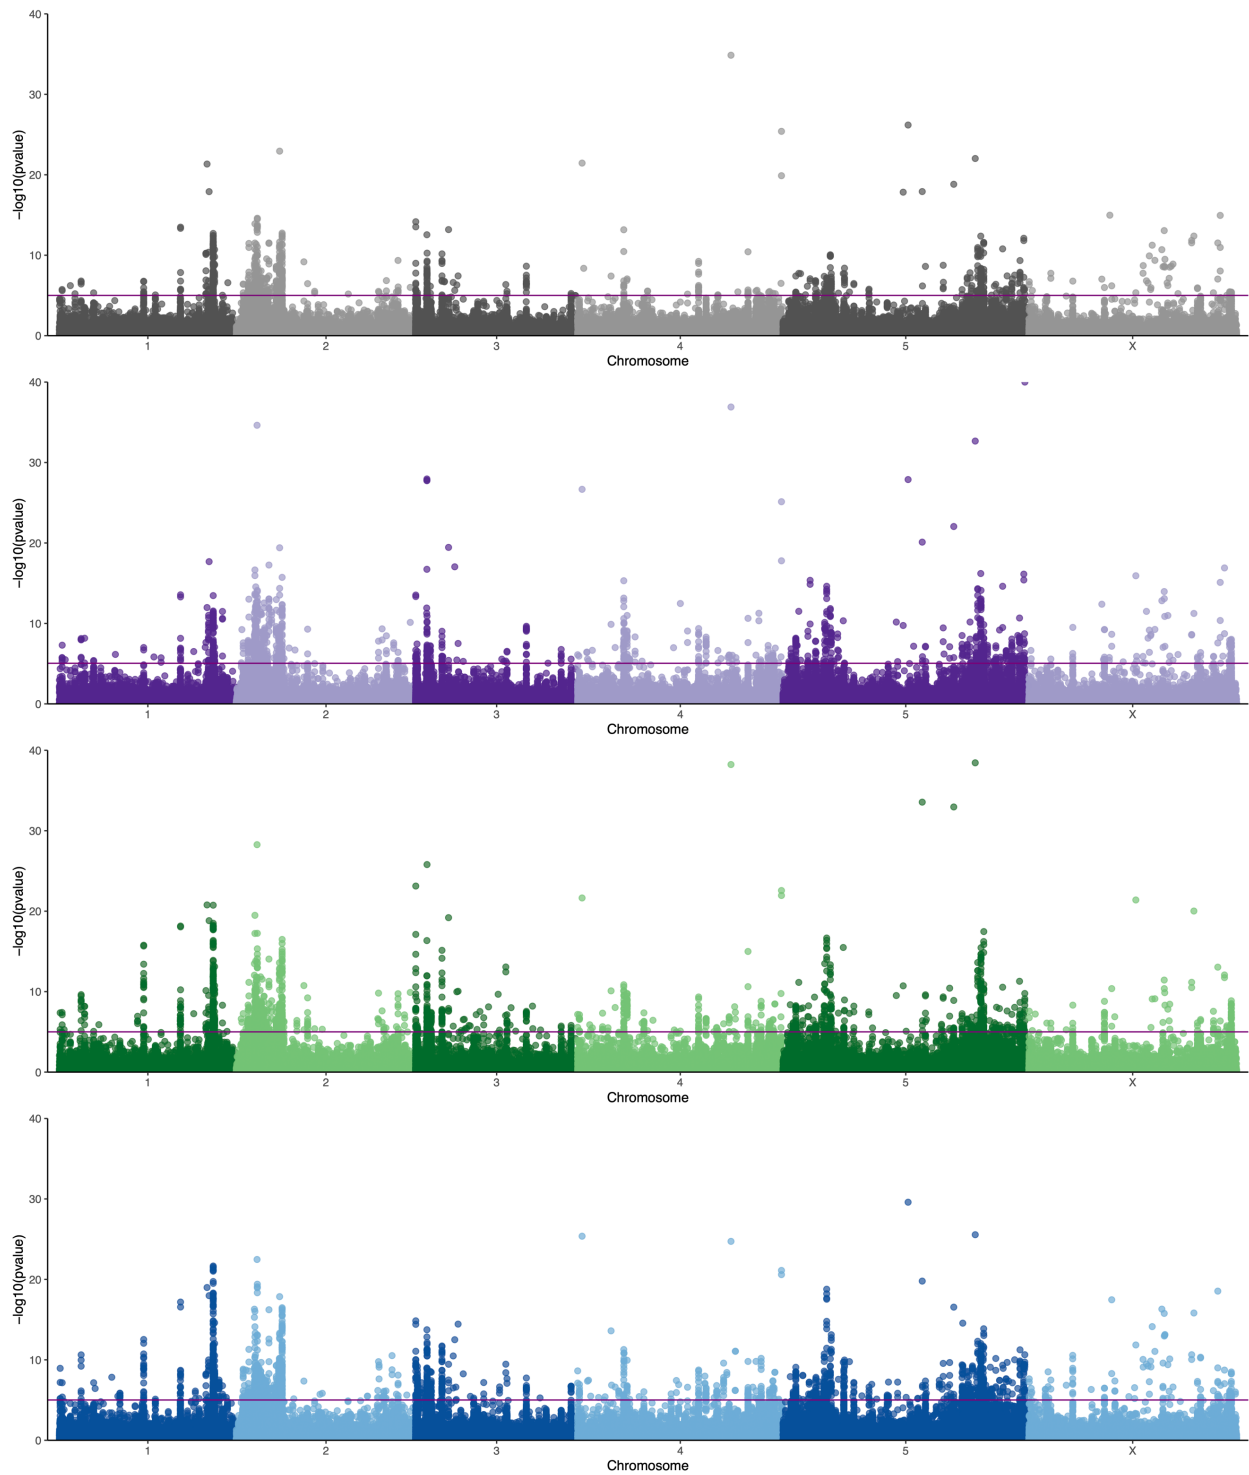

742

743 **Fig 3. Genomic response for each SNP over time fit for each regime (Model 2).** The  
 744 horizontal line represents the Bonferroni significance threshold. Reproductive success is a highly  
 745 polygenic trait with 49 peaks identified in the WS-P&P regime (gray), 77 in the BS-P&P regime

746 (purple), 102 in the WS-PO regime (green), and 107 in the BS-PO regime (blue). The  
747 distribution of peak overlaps is shown in Figure S3.

## 748 **Supporting information**

749 **S1 Fig. Schematic of strain construction.** **A)** The components for creating an obligate  
750 outcrossing sterility induction line were genetically engineered in the wild isolate background  
751 JU2526. The spermatogenesis gene *spe-44* was degraon-tagged and TIR1 was inserted to create  
752 strain PX737. The hermaphrodite self-sperm gene (*fog-2*) was knocked-out to create strain  
753 PX738. These strains are used in panels C and D. **B)** To generate an inducible lethality line, heat-  
754 shock driven *peel-1* was inserted into the CB4856 background on Chromosomes I and II to  
755 create strains PX739 and PX630, respectively. These strains are used in panels D and E. **C)**  
756 Strains PX737 and PX738 were crossed to creating a male-female, inducible sterility triple  
757 mutant (PX624). Strain PX624 went through five low dose rounds of mutagenesis each followed  
758 by two recovery generations. After the final recovery generation, the population was expanded  
759 for 15 generations of lab adaptation to create the experimental evolution ancestral population  
760 (PX632). **D)** The competition strain has five transgenic modifications. Heat-shock driven *peel-1*  
761 was inserted on Chromosome III of strain PX737, creating an inducible lethality and inducible  
762 sterility strain (PX656). Strains PX624 and PX631 (panel E) were crossed to given another  
763 inducible lethality and sterility double mutant. These worms were backcrossed to PX624 five  
764 times to give a predominantly JU2526 genomic background. This strain, PX655, was crossed  
765 with PX656 yielding a quintuple mutant, which was inbred to three generations followed by five  
766 generations of lab adaptation. The final strain PX658 served as the competitor during  
767 experimental evolution. **E)** A separate bioassay competitor strain was generated by introgressing  
768 the *fog-2*(q71) mutation into PX739. These worms were backcrossed to the CB4856 genomic  
769 background four times and then inbred for 14 generations, creating strain PX626. This strain was  
770 crossed to PX630 to create an obligate outcrossing strain with two heat-shock driven *peel-1*  
771 insertions. The final strain PX631 served as the novel competitor during phenotypic assays.

772  
773 **S2 Fig. Genetic diversity of the ancestral population.** **A)** The minor allele frequency (MAF)  
774 across Chromosome II (as an exemplar). The genome-wide mean is shown in blue. **B)** Histogram  
775 of MAF counts across the entire genome binned by chromosome arms and chromosome center.  
776 Values of zero are excluded from the plot. **C)** Nucleotide diversity ( $\pi$ ) calculated per SNP across  
777 Chromosome II. The genome-wide mean is shown in blue. **D)** Histogram of nucleotide diversity  
778 across the entire genome binned by chromosome arms and chromosome center. Values of zero

779 are excluded from the plot. **E)** SNP density ( $\theta_w$ ) per base pair across Chromosome II. The  
780 genome-wide mean is shown in blue. **F)** Histogram of SNP density in 1kb windows across the  
781 entire genome binned by chromosome arms and chromosome center.

782

783 **S3 Fig. The estimated effective population size ( $N_e$ ) per chromosome for all replicates.** The  
784 effective population size was greatly reduced compared to the census size ( $N = 5,000$ ). Regime  
785 did not have a significant effect on effective population size ( $F = 0.72$ , d.f. = 3,  $p = 0.54$ ).

786

787 **S4 Fig. Breakdown of significance peaks from Model 2.** The counts of significance peaks are  
788 shown along with the combination of regimes contributing to that count. Unique peaks are  
789 represented by a single black dot for the given regime. Shared peaks have multiple connected  
790 black dots. The total number of significant SNPs within each regime is given.

791

792 **S5 Fig. Zoom plot of the major significance peak on the right arm of Chromosome I.**  
793 Significant SNPs pile up in the second intron of gene C17H1.2. This gene has male-biased  
794 expression, though it's function is uncharacterized.

795

796 **S6 Fig. The molecular functions for genes associated with significance peaks based on a GO**  
797 **analysis.** Ubiquitin ligase complex formation through F-box proteins, carbohydrate binding, G-  
798 coupled protein receptor activity, and transferase transporter activity were the most common  
799 functions identified. However, the majority of genes are yet uncharacterized in function.

800

801 **S1 Table. Guide sequences.** The guide sequence, genomic location, target region/gene, and  
802 format (plasmid or cr:tracrRNA) are given.

803

804 **S2 Table. Plasmid construction.** The plasmid name and insert are given for both plasmids used  
805 in construction and as repair templates.

806

807 **Table S3. Primers.** The primer name, sequence (in 5' to 3' orientation), and purpose for a given  
808 primer are listed.

809

810 **Table S4. Strains generated in this study.** Full genotype information for each strain used in  
811 this study, along with the genomic background, method of construction, and generations of  
812 backcrossing and/or inbreeding.

813

814 **S1 File. SNP data for the ancestor.** The chromosome, position (in base pairs), reference allele,  
815 alternate allele, counts of reference alleles, counts of alternate alleles, total coverage, minor allele  
816 frequency (MAF), chromosome domain, and nucleotide diversity ( $\pi$ ) are given.

817

818 **S2 File. Watterson's theta calculated in 1kb windows across each chromosome.** The  
819 chromosome, chromosome domain, theta per window, and theta per base pair are given.

820

821 **S3 File. Effective population size estimated using Waples Plan II sampling for each  
822 replicate and each chromosome.**

823

824 **S4 File. Summary statistics for the Model 1 planned comparison analysis of ancestral  
825 versus evolved allele counts.** For each SNP, the chromosome and position (in base pairs) is  
826 given along with the slope estimate and p-value for each regime comparison.

827

828 **S5 File. Summary statistics for the Model 2 GLM analysis of allele counts over time for  
829 each regime.** For each SNP within each regime, the chromosome and position (in base pairs) is  
830 given along with the model intercept, slope estimate, standard error, z-value, and p-value.

831

832 **S6 File. Summary of the significance peaks identified using the Model 2 genomic results.**  
833 The chromosome, start position (in base pairs), stop position (in base pairs), presence in each  
834 treatment, associated gene, genetic region, molecular function (from GO analysis), and  
835 biological function (from GO analysis) are given.

836

837 **S7 File. Competitive phenotyping data for the ancestor and all evolved replicates.**

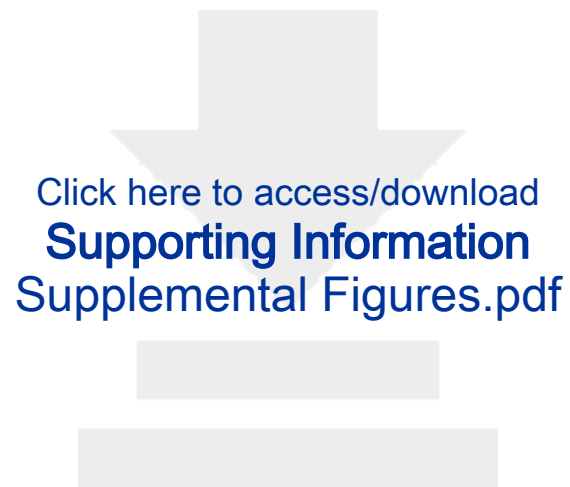

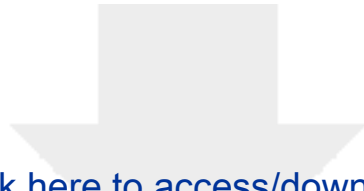

[Click here to access/download](#)

**Supporting Information - Compressed/ZIP File Archive  
Supplemental Tables.zip**

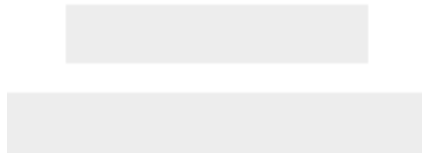

Supplement: pgen.1010063.s019.pdf [file pgen.1010063.s019.pdf]
